# Supplementary material for: The impact of positional isomerism on electronic and photochromic properties of 1D zinc-based naphthalene diimide coordination polymers
Source: Royal Society of Chemistry journal article supplement (doi:10.1039/d0ce00025f), 2020-01-01
Supplement: d0ce00025f1.pdf [file d0ce00025f1.pdf]

Electronic Supplementary Material (ESI) for CrystEngComm.

This journal is © The Royal Society of Chemistry 2020

# The impact of positional isomerism on electronic and photochromic properties of 1-D zinc-based naphthalene diimide coordination polymers

Pengfei Hao,\* Huihui Zhu, Yue Pang, Junju Shen, and Yunlong Fu\*

*Key Laboratory of Magnetic Molecules & Magnetic Information Materials Ministry of Education, School of Chemical and Material Science, Shanxi Normal University, Linfen 041004, China*

## Content

|                                                                                                                                                                                                   |   |
|---------------------------------------------------------------------------------------------------------------------------------------------------------------------------------------------------|---|
| <b>1. Figures</b> .....                                                                                                                                                                           | 2 |
| <b>Fig. S1.</b> The asymmetric unit of <b>1</b> (symmetry codes: A: $-1+x, -1+y, 1+z$ ).....                                                                                                      | 2 |
| <b>Fig. S2.</b> View of the coordination modes of zinc ions and ligands in <b>2</b> (symmetry codes: A: $1-x, y, 3/2-z$ ; B: $-x, 1-y, 2-z$ ; C: $1+x, 1-y, -1/2+z$ ; D: $1-x, y, 1/2-z$ ) . .... | 2 |
| <b>Fig. S3.</b> Thermo-gravimetric (TG) and Differential scanning calorimetry (DSC) curves of <b>1</b> . ...                                                                                      | 2 |
| <b>Fig. S4.</b> Thermo-gravimetric (TG) and Differential scanning calorimetry (DSC) curves of <b>2</b> . ...                                                                                      | 3 |
| <b>Fig. S5.</b> Powder X-ray diffraction (PXRD) patterns for <b>1</b> and <b>1P</b> at room temperature. ....                                                                                     | 3 |
| <b>Fig. S6.</b> Powder X-ray diffraction (PXRD) patterns for <b>2</b> and <b>2P</b> at room temperature. ....                                                                                     | 3 |
| <b>Fig. S7.</b> IR spectra of <b>1</b> .....                                                                                                                                                      | 4 |
| <b>Fig. S8.</b> IR spectra of <b>2</b> .....                                                                                                                                                      | 4 |
| <b>Fig. S9.</b> UV-vis absorption spectra of free 3-DPNDI and 4-DPNDI.....                                                                                                                        | 4 |
| <b>Fig. S10.</b> The switching cycles of coloration-decoloration processes of <b>1</b> upon alternating UV light illumination and thermal treatment.....                                          | 5 |
| <b>Fig. S11.</b> The switching cycles of coloration-decoloration processes of <b>2</b> upon alternating UV light illumination and thermal treatment.....                                          | 5 |
| <b>2. Tables</b> .....                                                                                                                                                                            | 6 |
| <b>Table S1.</b> Crystallographic data and refinement of compounds <b>1</b> and <b>2</b> . ....                                                                                                   | 6 |
| <b>Table S2.</b> Selected bond lengths (Å) and angles (°) for compounds <b>1</b> and <b>2</b> . ....                                                                                              | 7 |
| <b>Table S3.</b> Hydrogen bonds of for compounds <b>1</b> , and <b>2</b> (Å and °). ....                                                                                                          | 9 |
| <b>Table S4.</b> $\pi$ - $\pi$ interactions for compound <b>1</b> .....                                                                                                                           | 9 |

## 1. Figures

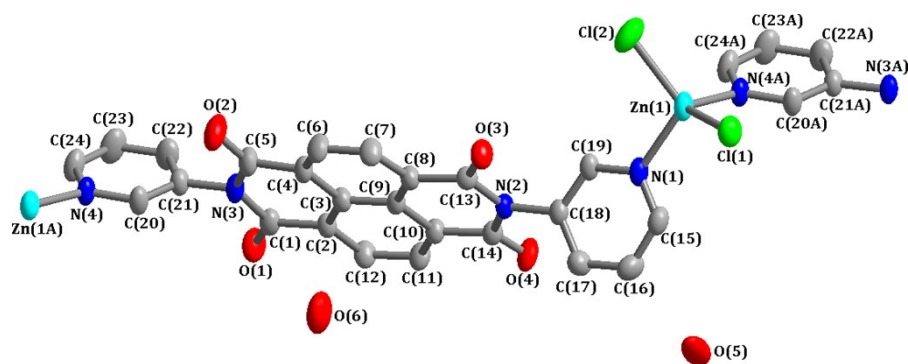

**Fig. S1.** The asymmetric unit of **1** (symmetry codes: A:  $-1+x, -1+y, 1+z$ ).

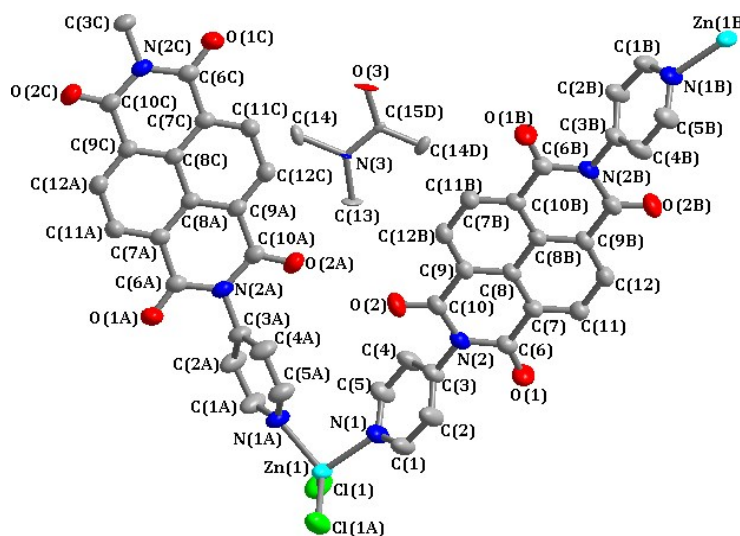

**Fig. S2.** View of the coordination modes of zinc ions and ligands in **2** (symmetry codes: A:

$1-x, y, 3/2-z$ ; B:  $-x, 1-y, 2-z$ ; C:  $1+x, 1-y, -1/2+z$ ; D:  $1-x, y, 1/2-z$ ).

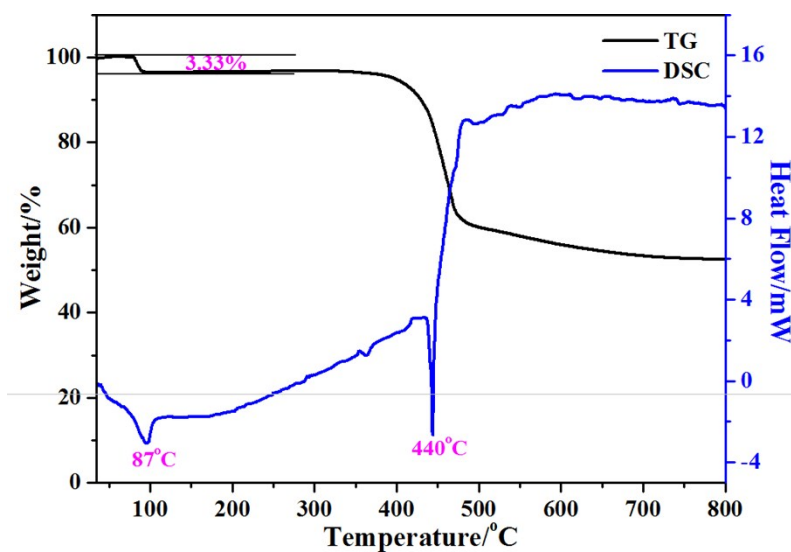

**Fig. S3.** Thermo-gravimetric (TG) and Differential scanning calorimetry (DSC) curves of **1**.

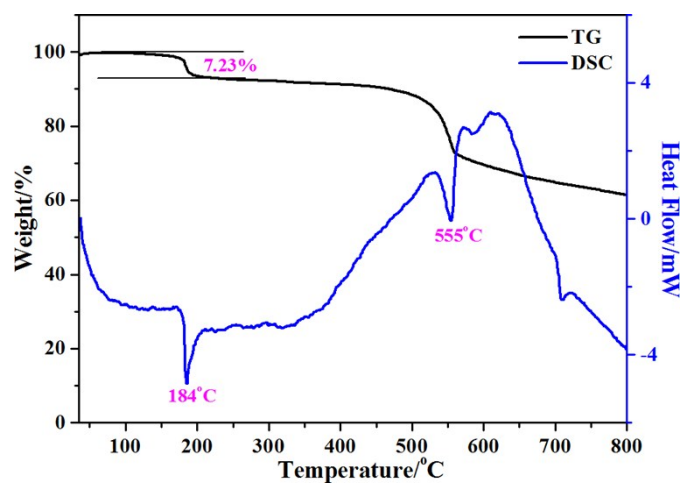

Fig. S4. Thermo-gravimetric (TG) and Differential scanning calorimetry (DSC) curves of **2**.

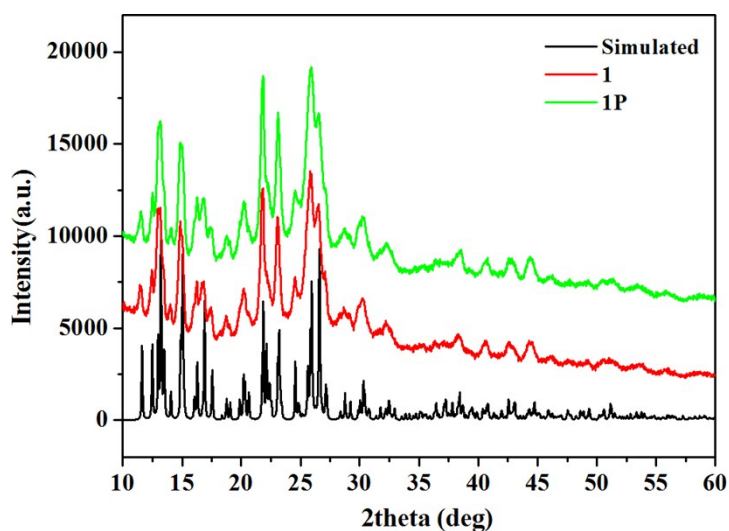

Fig. S5. Powder X-ray diffraction (PXRD) patterns for **1** and **1P** at room temperature.

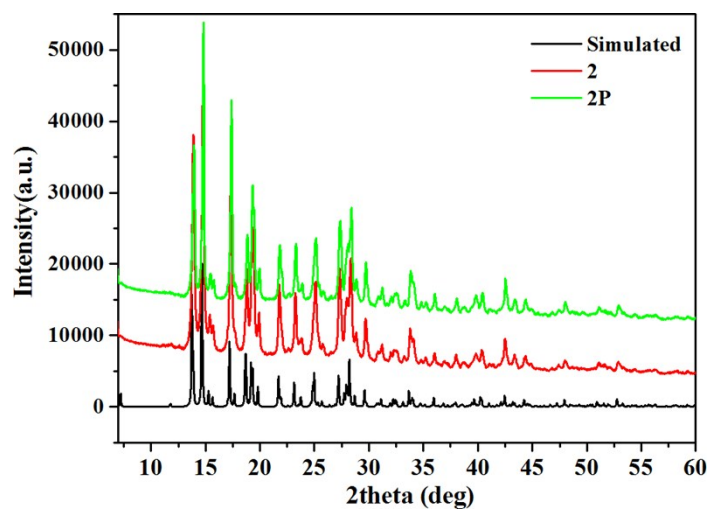

Fig. S6. Powder X-ray diffraction (PXRD) patterns for **2** and **2P** at room temperature.

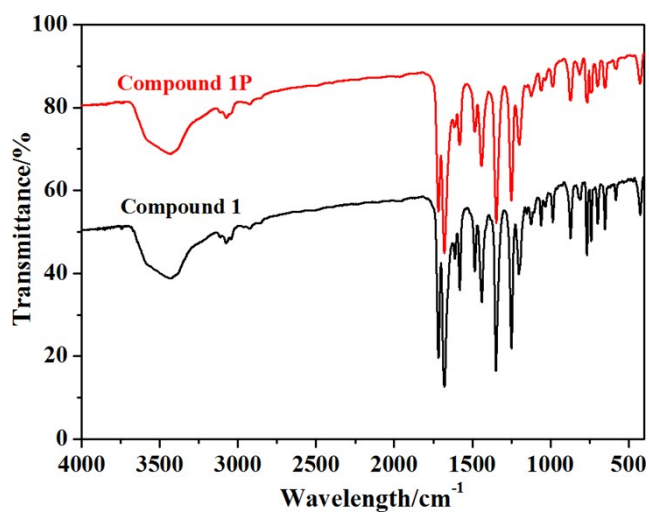

Fig. S7. IR spectra of 1.

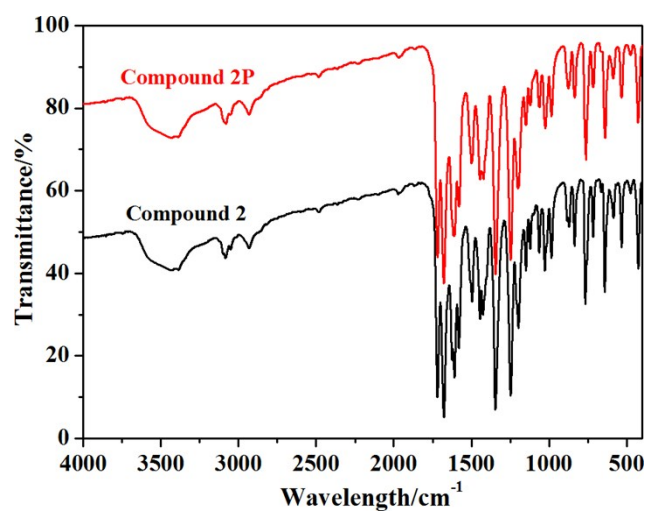

Fig. S8. IR spectra of 2.

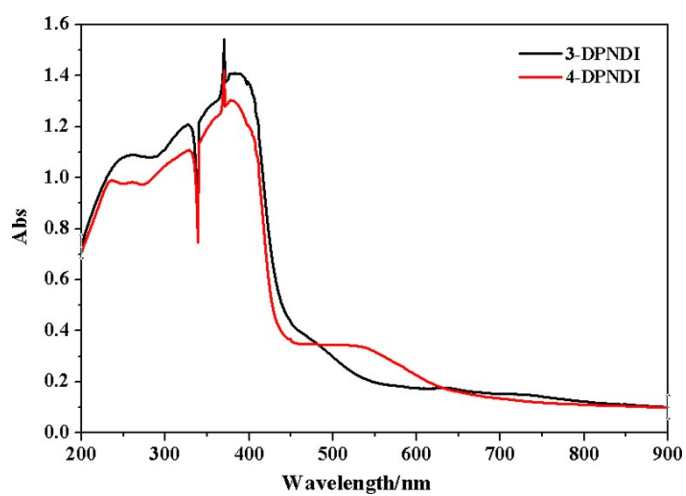

Fig. S9. UV-vis absorption spectra of free 3-DPNDI and 4-DPNDI.

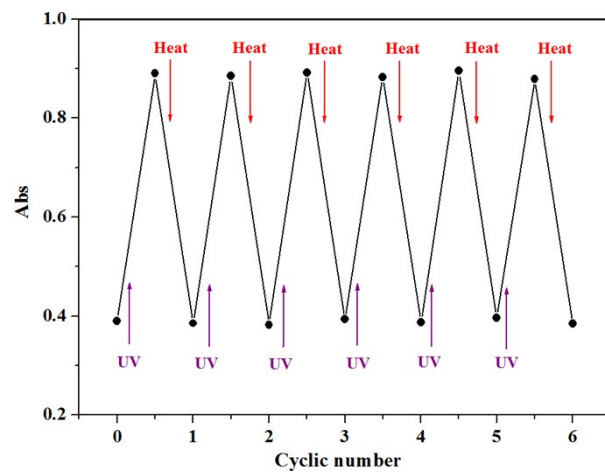

**Fig. S10.** The switching cycles of coloration-decoloration processes of **1** upon alternating UV light illumination and thermal treatment.

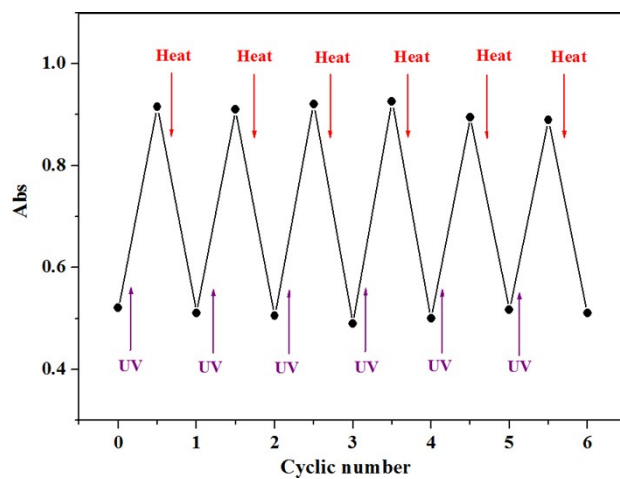

**Fig. S11.** The switching cycles of coloration-decoloration processes of **2** upon alternating UV light illumination and thermal treatment.

## 2. Tables

**Table S1.** Crystallographic data and refinement of compounds **1** and **2**.

| Compounds                                                                                    | <b>1</b>                                                                         | <b>2</b>                                                                         |
|----------------------------------------------------------------------------------------------|----------------------------------------------------------------------------------|----------------------------------------------------------------------------------|
| Empirical formula                                                                            | C <sub>24</sub> H <sub>12</sub> Cl <sub>2</sub> N <sub>4</sub> O <sub>5</sub> Zn | C <sub>28</sub> H <sub>21</sub> Cl <sub>2</sub> N <sub>5</sub> O <sub>5</sub> Zn |
| Formula weight                                                                               | 572.65                                                                           | 643.77                                                                           |
| Crystal system                                                                               | Triclinic                                                                        | Monoclinic                                                                       |
| Space group                                                                                  | <i>P</i> -1                                                                      | <i>P</i> 2/ <i>c</i>                                                             |
| <i>a</i> (Å)                                                                                 | 7.2372(11)                                                                       | 7.5740(8)                                                                        |
| <i>b</i> (Å)                                                                                 | 12.7860(19)                                                                      | 12.2366(12)                                                                      |
| <i>c</i> (Å)                                                                                 | 14.237(2)                                                                        | 15.0059(15)                                                                      |
| $\alpha$ (°)                                                                                 | 68.774(3)                                                                        | 90                                                                               |
| $\beta$ (°)                                                                                  | 78.572(4)                                                                        | 93.741(3)                                                                        |
| $\gamma$ (°)                                                                                 | 81.970(4)                                                                        | 90                                                                               |
| <i>V</i> (Å <sup>3</sup> )                                                                   | 1200.4(3)                                                                        | 1387.8(2)                                                                        |
| $\mu$ (mm <sup>-1</sup> )                                                                    | 1.290                                                                            | 1.126                                                                            |
| <i>R</i> <sub>int</sub>                                                                      | 0.0546                                                                           | 0.0221                                                                           |
| Goodness-of-fit on <i>F</i> <sup>2</sup>                                                     | 1.093                                                                            | 1.046                                                                            |
| <i>R</i> <sub>1</sub> / <i>wR</i> <sub>2</sub> , [ <i>I</i> ≥ 2σ( <i>I</i> )] <sup>a,b</sup> | 0.0700/0.1670                                                                    | 0.0320/0.0839                                                                    |
| <i>R</i> <sub>1</sub> / <i>wR</i> <sub>2</sub> , (all data)                                  | 0.1390/0.1936                                                                    | 0.0392/0.0879                                                                    |

$${}^a R_1 = \sum ||F_o| - |F_c|| / \sum |F_o|$$

$${}^b wR_2 = [\sum w(F_o^2 - F_c^2)^2 / \sum w(F_o^2)^2]^{1/2}$$

**Table S2.** Selected bond lengths (Å) and angles (°) for compounds **1** and **2**.

| Compound 1                     |            |                    |            |
|--------------------------------|------------|--------------------|------------|
| Zn(1)-Cl(2)                    | 2.2071(17) | Zn(1)-Cl(1)        | 2.2226(15) |
| N(1)-Zn(1)                     | 2.029(4)   | Zn(1)-N(4)#2       | 2.047(4)   |
| C(1)-O(1)                      | 1.202(6)   | C(1)-N(3)          | 1.402(6)   |
| C(1)-C(2)                      | 1.492(6)   | C(2)-C(12)         | 1.376(7)   |
| C(2)-C(3)                      | 1.402(7)   | C(3)-C(9)          | 1.408(6)   |
| C(3)-C(4)                      | 1.417(6)   | C(4)-C(6)          | 1.365(7)   |
| C(4)-C(5)                      | 1.471(7)   | C(5)-O(2)          | 1.212(6)   |
| C(5)-N(3)                      | 1.396(7)   | C(6)-C(7)          | 1.378(7)   |
| C(7)-C(8)                      | 1.376(7)   | C(8)-C(9)          | 1.405(7)   |
| C(8)-C(13)                     | 1.476(6)   | C(9)-C(10)         | 1.420(6)   |
| C(10)-C(11)                    | 1.368(7)   | C(10)-C(14)        | 1.482(6)   |
| C(11)-C(12)                    | 1.416(7)   | C(13)-O(3)         | 1.194(6)   |
| C(13)-N(2)                     | 1.408(6)   | C(14)-O(4)         | 1.203(6)   |
| C(14)-N(2)                     | 1.397(6)   | C(15)-N(1)         | 1.322(7)   |
| C(15)-C(16)                    | 1.367(8)   | C(16)-C(17)        | 1.379(7)   |
| C(17)-C(18)                    | 1.381(8)   | C(18)-C(19)        | 1.373(7)   |
| C(18)-N(2)                     | 1.445(6)   | C(19)-N(1)         | 1.349(6)   |
| C(20)-N(4)                     | 1.339(6)   | C(20)-C(21)        | 1.366(7)   |
| C(21)-C(22)                    | 1.371(8)   | C(21)-N(3)         | 1.442(6)   |
| C(22)-C(23)                    | 1.387(8)   | C(23)-C(24)        | 1.373(8)   |
| C(24)-N(4)                     | 1.332(7)   |                    |            |
|                                |            |                    |            |
| N(4)#2-Zn(1)-Cl(2)             | 108.10(14) | N(1)-Zn(1)-Cl(1)   | 106.96(13) |
| N(4)#2-Zn(1)-Cl(1)             | 106.10(12) | Cl(2)-Zn(1)-Cl(1)  | 119.32(6)  |
| C(24)-N(4)-Zn(1)#1             | 122.6(3)   | C(20)-N(4)-Zn(1)#1 | 118.9(4)   |
| N(1)-Zn(1)-N(4)#2              | 107.27(18) | N(1)-Zn(1)-Cl(2)   | 108.52(13) |
| O(1)-C(1)-N(3)                 | 120.9(4)   | O(1)-C(1)-C(2)     | 123.5(5)   |
| N(3)-C(1)-C(2)                 | 115.6(4)   | C(12)-C(2)-C(3)    | 120.1(4)   |
| C(12)-C(2)-C(1)                | 119.7(4)   | C(3)-C(2)-C(1)     | 120.2(4)   |
| C(2)-C(3)-C(9)                 | 120.0(4)   | C(2)-C(3)-C(4)     | 121.3(4)   |
| C(9)-C(3)-C(4)                 | 118.7(4)   | C(6)-C(4)-C(3)     | 120.0(4)   |
| C(6)-C(4)-C(5)                 | 120.3(4)   | C(3)-C(4)-C(5)     | 119.7(5)   |
| O(2)-C(5)-N(3)                 | 120.5(5)   | O(2)-C(5)-C(4)     | 122.6(5)   |
| N(3)-C(5)-C(4)                 | 116.9(4)   | C(4)-C(6)-C(7)     | 121.0(5)   |
| C(8)-C(7)-C(6)                 | 120.4(5)   | C(7)-C(8)-C(9)     | 120.2(4)   |
| C(7)-C(8)-C(13)                | 119.4(4)   | C(9)-C(8)-C(13)    | 120.4(4)   |
| C(8)-C(9)-C(3)                 | 119.4(4)   | C(8)-C(9)-C(10)    | 121.2(4)   |
| #1 x+1,y+1,z-1; #2 x-1,y-1,z+1 |            |                    |            |

| Compound 2        |            |                     |            |
|-------------------|------------|---------------------|------------|
| Zn(1)-N(1)        | 2.0680(15) | Zn(1)-Cl(1)         | 2.2068(6)  |
| C(1)-N(1)         | 1.339(2)   | C(1)-C(2)           | 1.377(2)   |
| C(2)-C(3)         | 1.367(2)   | C(2)-H(2)           | 0.9300     |
| C(3)-C(4)         | 1.375(3)   | C(3)-N(2)           | 1.4413(19) |
| C(4)-C(5)         | 1.377(2)   | C(5)-N(1)           | 1.334(2)   |
| C(6)-O(1)         | 1.210(2)   | C(6)-N(2)           | 1.400(2)   |
| C(6)-C(7)         | 1.479(2)   | C(7)-C(11)          | 1.376(2)   |
| C(7)-C(8)         | 1.410(2)   | C(8)-C(9)           | 1.410(2)   |
| C(9)-C(10)        | 1.479(2)   | C(10)-O(2)          | 1.208(2)   |
| C(10)-N(2)        | 1.402(2)   | C(11)-C(12)         | 1.401(2)   |
| C(14)-C(15)       | 1.463(4)   | C(14)-N(3)          | 1.581(4)   |
| C(15)-O(3)        | 1.292(4)   |                     |            |
| N(1)#1-Zn(1)-N(1) | 94.72(9)   | N(1)-Zn(1)-Cl(1)#1  | 103.55(5)  |
| N(1)-Zn(1)-Cl(1)  | 113.59(5)  | Cl(1)#1-Zn(1)-Cl(1) | 124.16(4)  |
| N(1)-C(1)-C(2)    | 122.83(17) | C(1)-C(2)-C(3)      | 118.37(17) |
| C(4)-C(3)-C(2)    | 119.85(15) | C(4)-C(3)-N(2)      | 119.29(14) |
| C(2)-C(3)-N(2)    | 120.85(16) | C(3)-C(4)-C(5)      | 118.07(16) |
| N(1)-C(5)-C(4)    | 123.06(17) | O(1)-C(6)-N(2)      | 120.58(15) |
| O(1)-C(6)-C(7)    | 123.44(16) | N(2)-C(6)-C(7)      | 115.97(14) |
| C(11)-C(7)-C(8)   | 120.38(13) | C(11)-C(7)-C(6)     | 119.33(14) |
| C(8)-C(7)-C(6)    | 120.28(14) | C(7)-C(8)-C(9)      | 121.48(13) |
| C(8)-C(9)-C(10)   | 119.70(14) | O(2)-C(10)-N(2)     | 120.63(14) |
| N(2)-C(10)-C(9)   | 116.47(14) | O(2)-C(10)-C(9)     | 122.90(16) |
| C(7)-C(11)-C(12)  | 120.05(15) | C(15)-C(14)-N(3)    | 37.51(17)  |
| O(3)-C(15)-C(14)  | 133.3(3)   | C(5)-N(1)-C(1)      | 117.61(15) |
| C(6)-N(2)-C(10)   | 126.08(13) | C(6)-N(2)-C(3)      | 117.27(14) |
| C(10)-N(2)-C(3)   | 116.52(14) |                     |            |
| #1 -x+1,y,-z+3/2  |            |                     |            |



**Table S3.** Hydrogen bonds of for compounds **1**, and **2** (Å and °).

| Compound 1                                                                                    |        |          |            |        |
|-----------------------------------------------------------------------------------------------|--------|----------|------------|--------|
| D-H...A                                                                                       | d(D-H) | d(H...A) | d(D...A)   | <(DHA) |
| C(15)-H(15)...O(3)#3                                                                          | 0.93   | 2.56     | 3.100(7)   | 117.2  |
| C(15)-H(15)...Cl(2)#4                                                                         | 0.93   | 2.84     | 3.513(5)   | 130.6  |
| C(16)-H(16)...O(3)#4                                                                          | 0.93   | 2.52     | 3.307(7)   | 142.1  |
| C(19)-H(19)...O(1)#5                                                                          | 0.93   | 2.61     | 3.067(7)   | 110.9  |
| C(20)-H(20)...O(5)#6                                                                          | 0.93   | 2.56     | 3.349(10)  | 143.4  |
| C(20)-H(20)...Cl(1)#1                                                                         | 0.93   | 2.85     | 3.448(5)   | 122.8  |
| C(23)-H(23)...Cl(2)#7                                                                         | 0.93   | 2.72     | 3.638(6)   | 170.2  |
| #1 x+1,y+1,z-1; #3 -x+1,-y+1,-z+2;#4 x-1,y,z;#5 -x+2,-y+1,-z+1;#6 x+1,y+1,z;#7 -x+3,-y+1,-z+1 |        |          |            |        |
| Compound 2                                                                                    |        |          |            |        |
| D-H...A                                                                                       | d(D-H) | d(H...A) | d(D...A)   | <(DHA) |
| C(11)-H(11)...Cl(1)#1                                                                         | 0.93   | 3.00     | 3.7107(19) | 134.2  |
| C(4)-H(4)...O(3)#4                                                                            | 0.93   | 2.47     | 3.235(3)   | 139.7  |
| #1 x-1, 2-y, 1/2+z; #4 -x,-y+1,-z+1                                                           |        |          |            |        |

**Table S4.** π-π interactions for compound **1**.

| Cg                                                                  | Cg             | Distances (Å) | Dihedral angles (°) | Ring-slippage (Å) |
|---------------------------------------------------------------------|----------------|---------------|---------------------|-------------------|
| C20 C21 C22                                                         | C20A C21A C22A | 3.9530(5)     | 0                   | 1.705             |
| C23 C24 N4                                                          | C23A C24A N4A  |               |                     |                   |
| C15 C16 C17                                                         | C15B C16B C17B | 3.9668(4)     | 0                   | 0.791             |
| C18 C19 N1                                                          | C18B C19B N1B  |               |                     |                   |
| C2 C3 C9                                                            | C8C C9C C10C   | 3.8946(4)     | 1.581               | 1.868             |
| C10 C11 C12                                                         | C13C C14C N2C  |               |                     |                   |
| C2 C3 C9                                                            | C2C C3C C9C    | 3.6616(5)     | 0                   | 1.320             |
| C10 C11 C12                                                         | C10C C11C C12C |               |                     |                   |
| A 2-x, 2-y, -z; B -x+1,-y+1,-z+2; B 1-x, 1-y, 2-z; C 2-x, 1-y, 1-z; |                |               |                     |                   |
